# Supplementary material for: Production of [11C]Carbon Labelled Flumazenil and L-Deprenyl Using the iMiDEV™ Automated Microfluidic Radiosynthesizer
Source: MDPI journal article supplement (doi:10.3390/molecules27248843), 2022-12-13
Supplement: s1 [file s1]

## Supplementary Materials

### Production of [ $^{11}\text{C}$ ]Carbon Labeled Flumazenil and *L*-Deprenyl Using the iMiDEV<sup>TM</sup> Automated Microfluidic Radiosynthesizer

Hemantha Mallapura<sup>1,\*</sup>, Laurent Tanguy<sup>2</sup>, Bengt Långström<sup>3</sup>, Ludovic Le Meunier<sup>2</sup>, Christer Halldin<sup>1</sup>, and Sangram Nag<sup>1</sup>

<sup>1</sup> Department of Clinical Neuroscience, Center for Psychiatry Research, Karolinska Institutet and Stockholm County Council, Stockholm 17176, Sweden

<sup>2</sup> PMB Alcen, Route des Michels CD56, F-13790 Peynier, France

<sup>3</sup> Department of Chemistry, Uppsala University, Sweden

\* Correspondence: hemantha.mallapura@ki.se; Tel.: +46-(0)-769084212

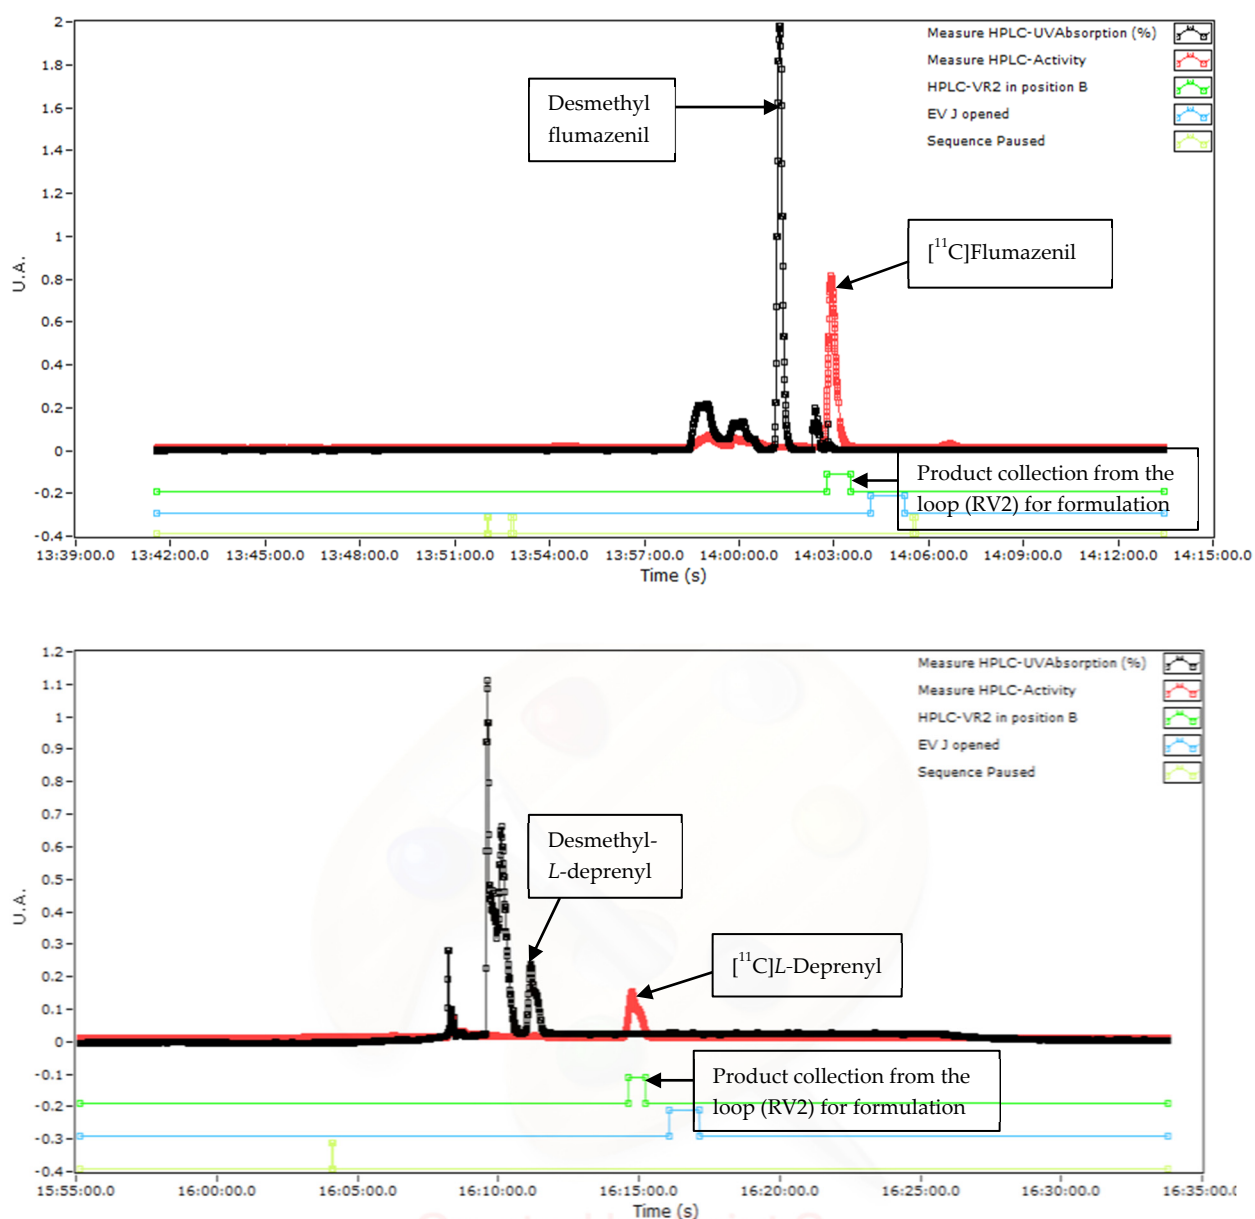

**Figure S1.** Semi preparative HPLC chromatograms of [ $^{11}\text{C}$ ]flumazenil and [ $^{11}\text{C}$ ]L-deprenyl.

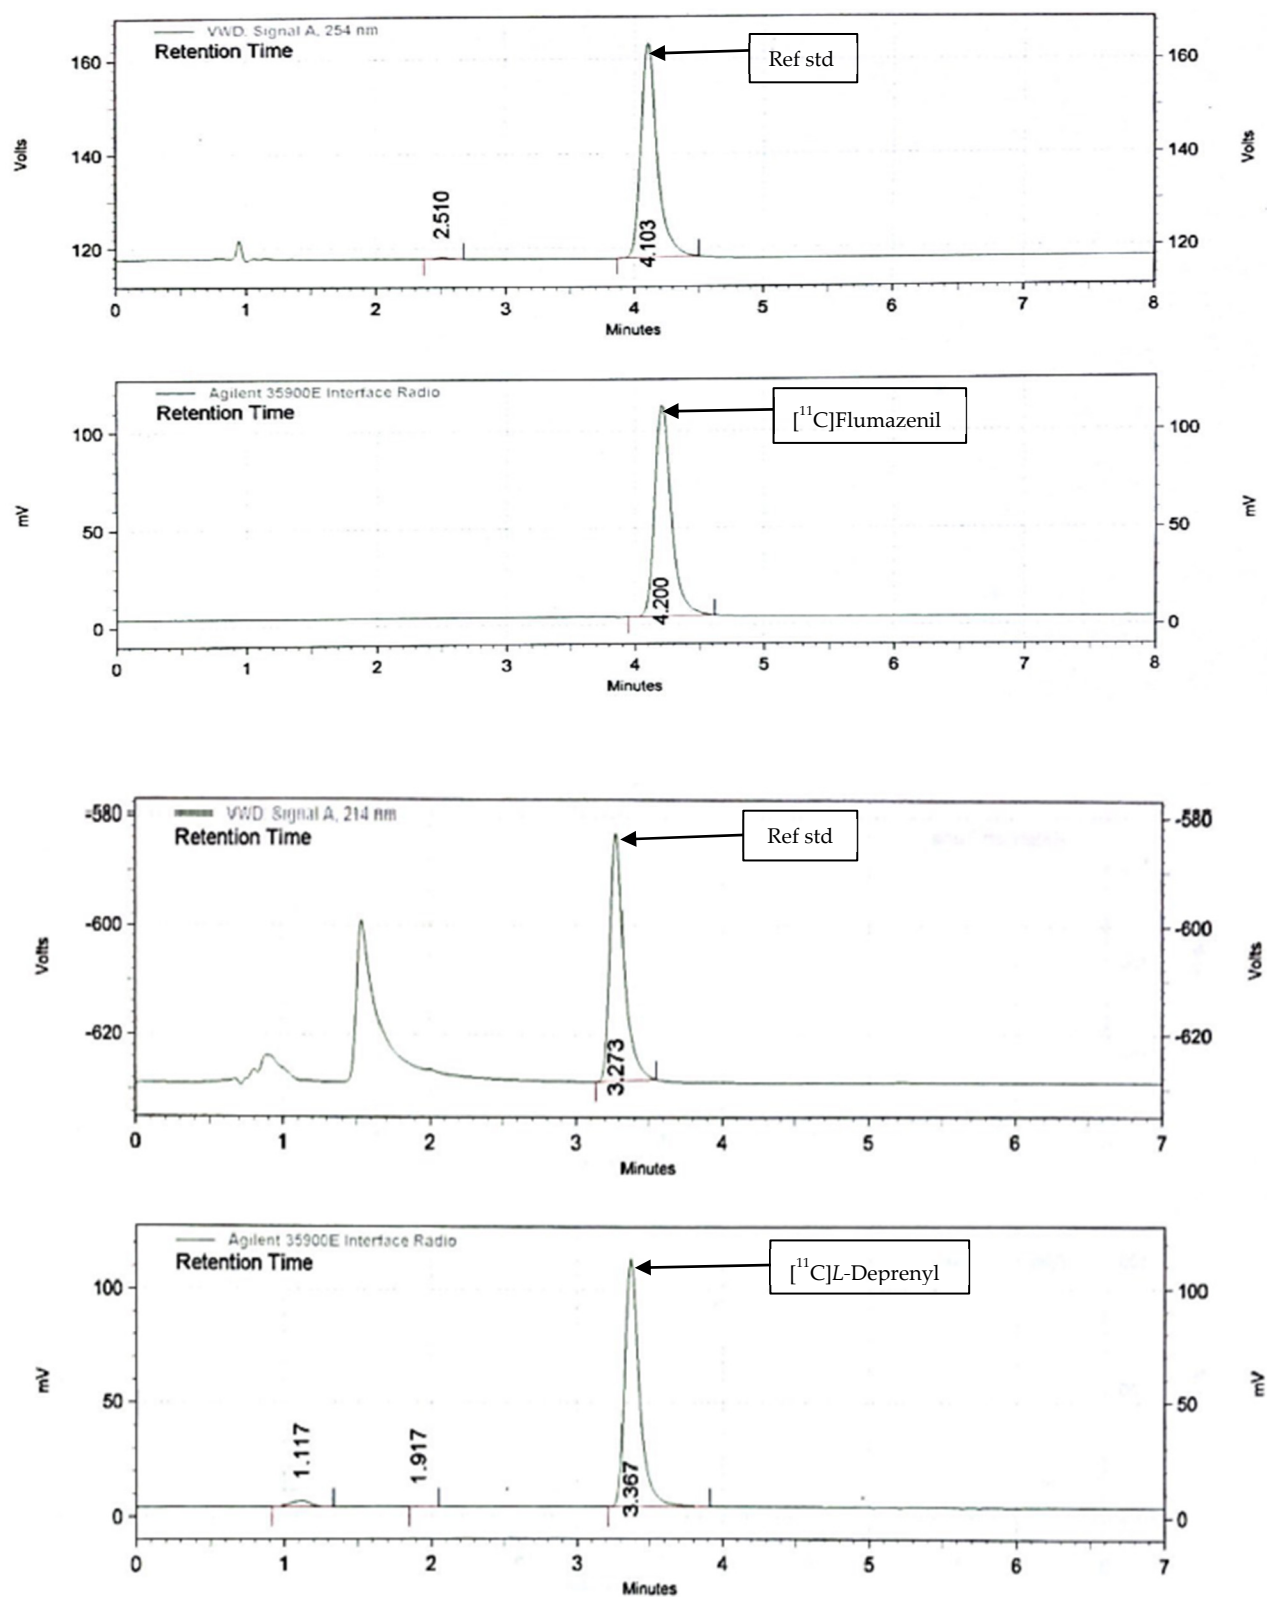

Figure S2. Analytical HPLC data of  $[^{11}\text{C}]$ flumazenil and  $[^{11}\text{C}]$ L-deprenyl.

**Table S1.** Methylating agents, solvents and bases used for [ $^{11}\text{C}$ ]flumazenil synthesis.

| [ $^{11}\text{C}$ ]Flumazenil synthesis |                            |               |         |
|-----------------------------------------|----------------------------|---------------|---------|
| Methylating agent                       | Solvent                    | Base          | RCC (%) |
| [ $^{11}\text{C}$ ]CH <sub>3</sub> OTf  | Acetone/DEK                | aq.<br>NaOH   | 0-20%   |
|                                         | Acetone                    |               |         |
|                                         | DMF                        |               |         |
|                                         | DMSO                       |               |         |
| [ $^{11}\text{C}$ ]CH <sub>3</sub> I    | MeOH and ACN               |               |         |
|                                         | DMSO                       |               |         |
|                                         | DMF                        |               |         |
|                                         | Acetonitrile               |               |         |
| [ $^{11}\text{C}$ ]CH <sub>3</sub> I    | DMSO                       | KOH<br>powder | 70%     |
|                                         | 1:1 mixture of<br>DMSO/DMF |               | 65-85%  |

DEK- Diethyl ketone

DMF - Dimethylformamide

DMSO – Dimethyl sulfoxide

RCC-Radiochemical conversion

**Table S2.** Methylating agents, solvents and bases used for the [ $^{11}\text{C}$ ]L-deprenyl synthesis.

| [ $^{11}\text{C}$ ]L-Deprenyl synthesis |                         |                                 |         |
|-----------------------------------------|-------------------------|---------------------------------|---------|
| Methylating agent                       | Solvent                 | Base                            | RCC (%) |
| [ $^{11}\text{C}$ ]CH <sub>3</sub> OTf  | MeOH and ACN            | PMP                             | > 65%   |
|                                         | Diethyl ketone          | aq. NaOH                        | None    |
| [ $^{11}\text{C}$ ]CH <sub>3</sub> I    | 1:1 mixture of DMSO/DMF | KOH powder                      | None    |
|                                         |                         | PMP                             |         |
|                                         | DMF                     | Cs <sub>2</sub> CO <sub>3</sub> |         |
|                                         |                         | NaH                             |         |
|                                         |                         | TBAH                            |         |

Cs<sub>2</sub>CO<sub>3</sub> - Cesium carbonate

NaH - Sodium Hydride

TBAH- Tetrabutylammonium hydroxide

PMP- Pentamethylpiperidine

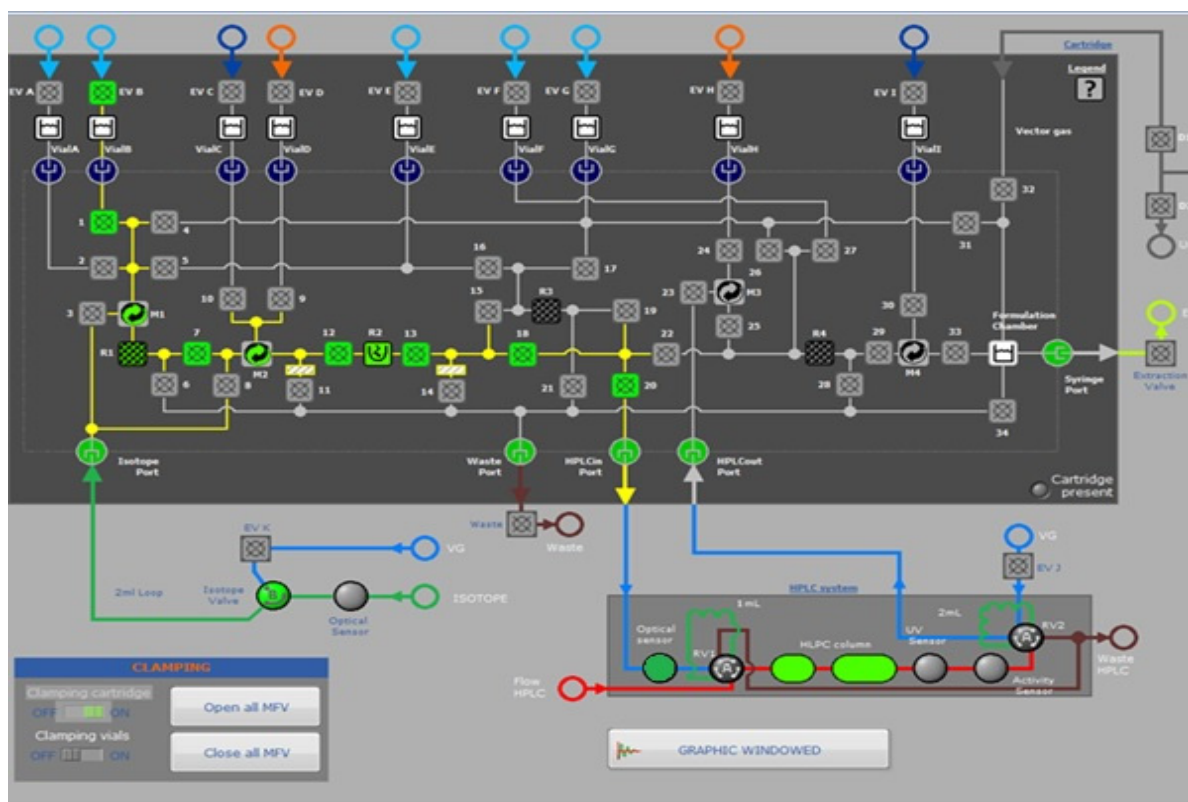

Figure S3. Semi-preparative HPLC injection from the vial B.

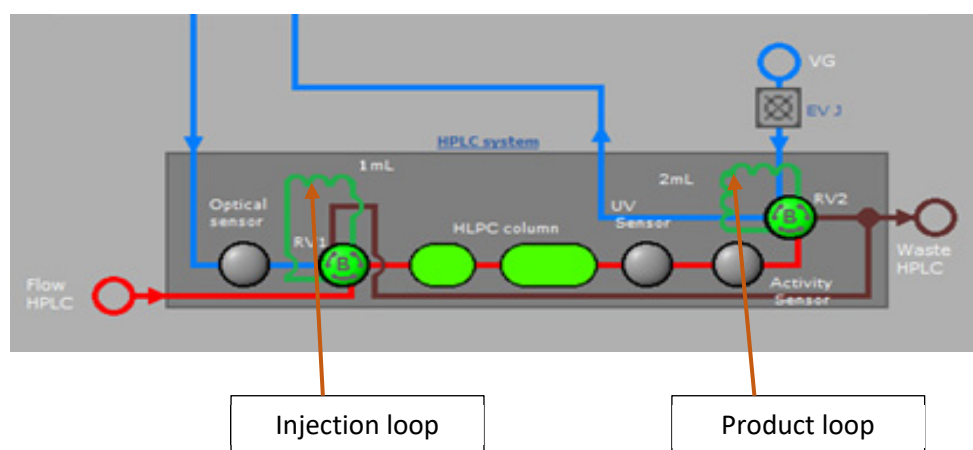

Figure S4. Semi-preparative HPLC purification (product collection) from the RV2 loop (position B).

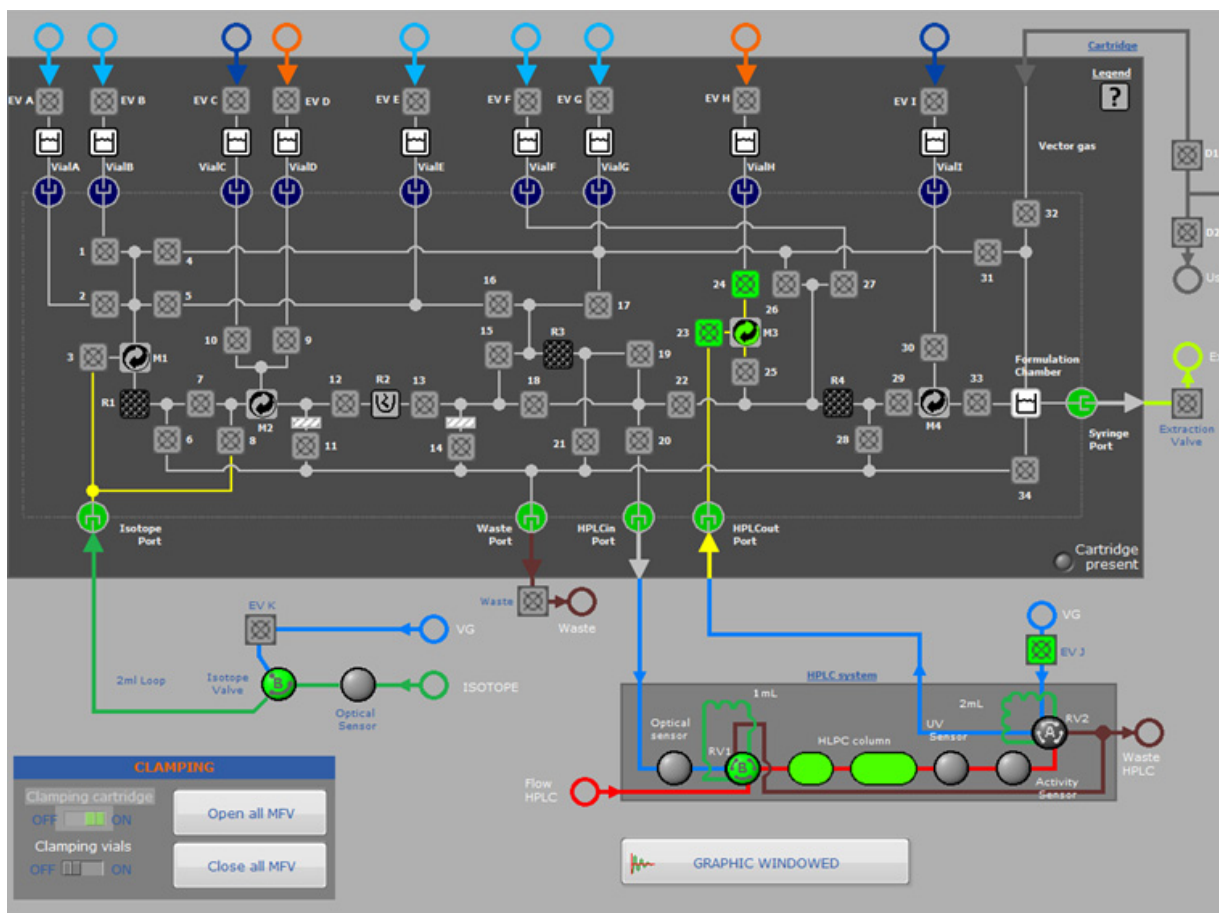

**Figure S5.** Pushing the product from the loop RV2 (Position A) to the vial H in the iMiDEV™ cassette.

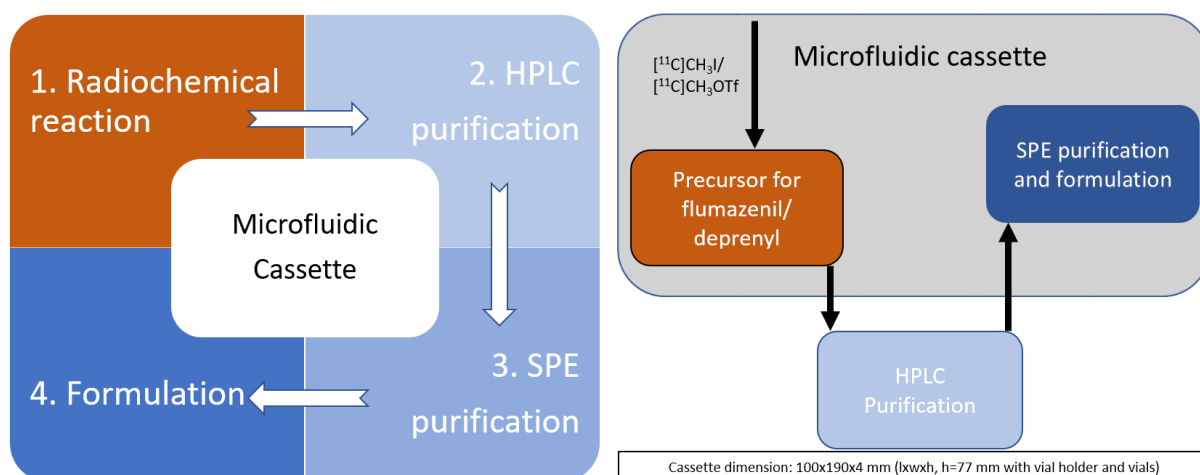

**Figure S6.** Flow chart of the synthesis steps performed on a microfluidic cassette.
