# Supplementary material for: Production of [11C]Carbon Labelled Flumazenil and L-Deprenyl Using the iMiDEV™ Automated Microfluidic Radiosynthesizer
Source: MDPI journal article supplement (doi:10.3390/molecules27248843), 2022-12-13
Supplement: s1 [file s1]

|                         |                                                                                          |
|-------------------------|------------------------------------------------------------------------------------------|
| User                    | HEMANTHA                                                                                 |
| Recipe name             | 20211027_FMZ_R1,HPLC waste and<br>Formlt and vial F elution_4mL_35%<br>ACN_B_500mbar.csv |
| Recipe SHA1             | D9CFF20ED444B9D7D676934948193<br>191B36A01DC                                             |
| Version supervision     | 1.0.2.8                                                                                  |
| Version API Synthèse    | 1.0.0.14                                                                                 |
| Version API Radiochimie |                                                                                          |
| Total time              | 00:31:53.760                                                                             |
| Start hour              | 13:41:32.700                                                                             |
| Stop hour               | 14:13:26.460                                                                             |

Default & Clamping

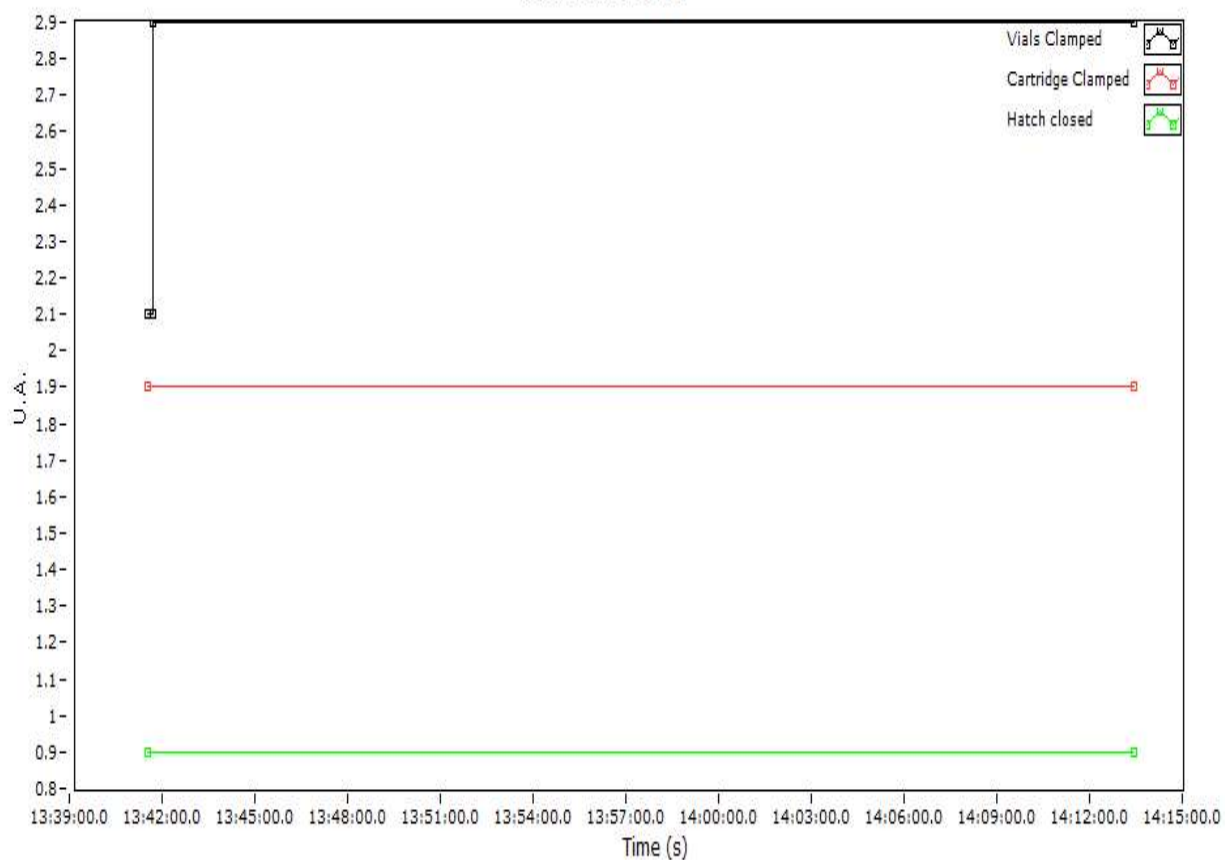

Default & Clamping

Pressure VG

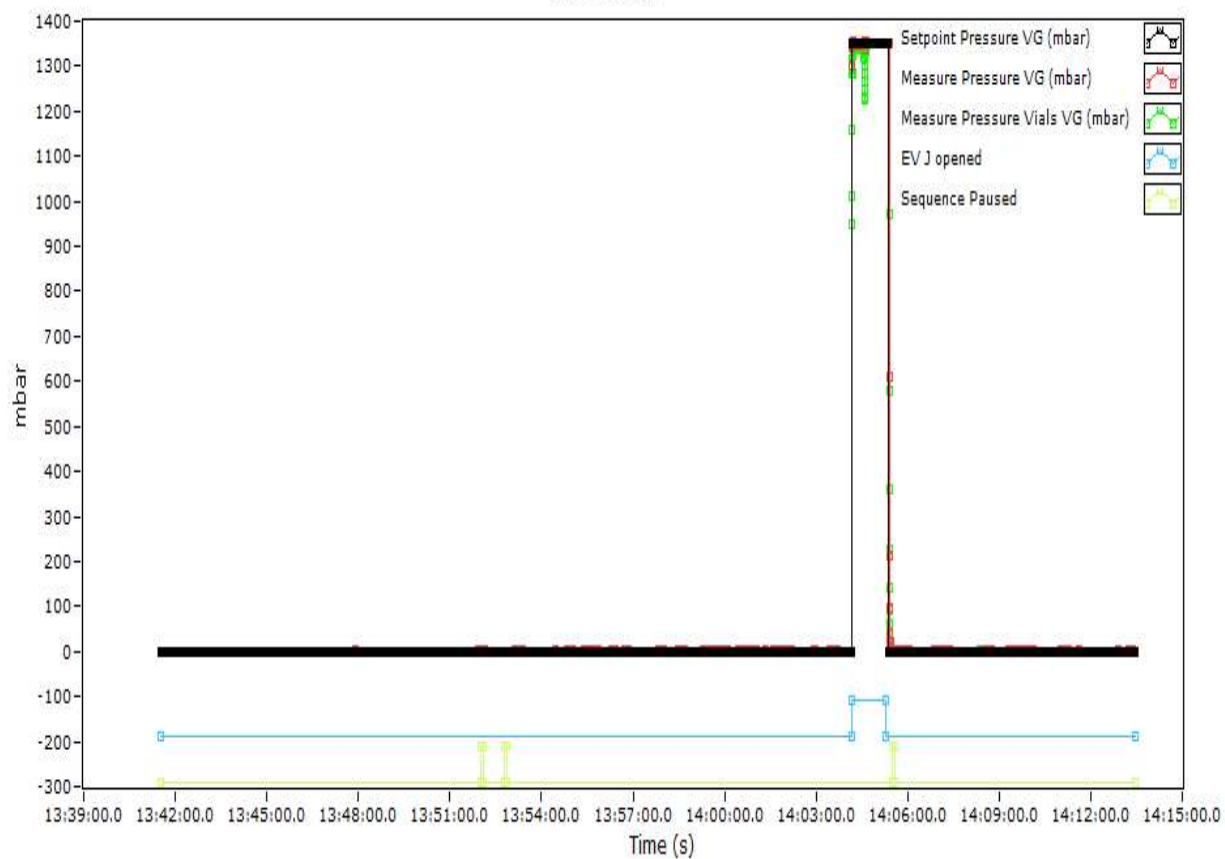

Pressure VG

Pressure track 1

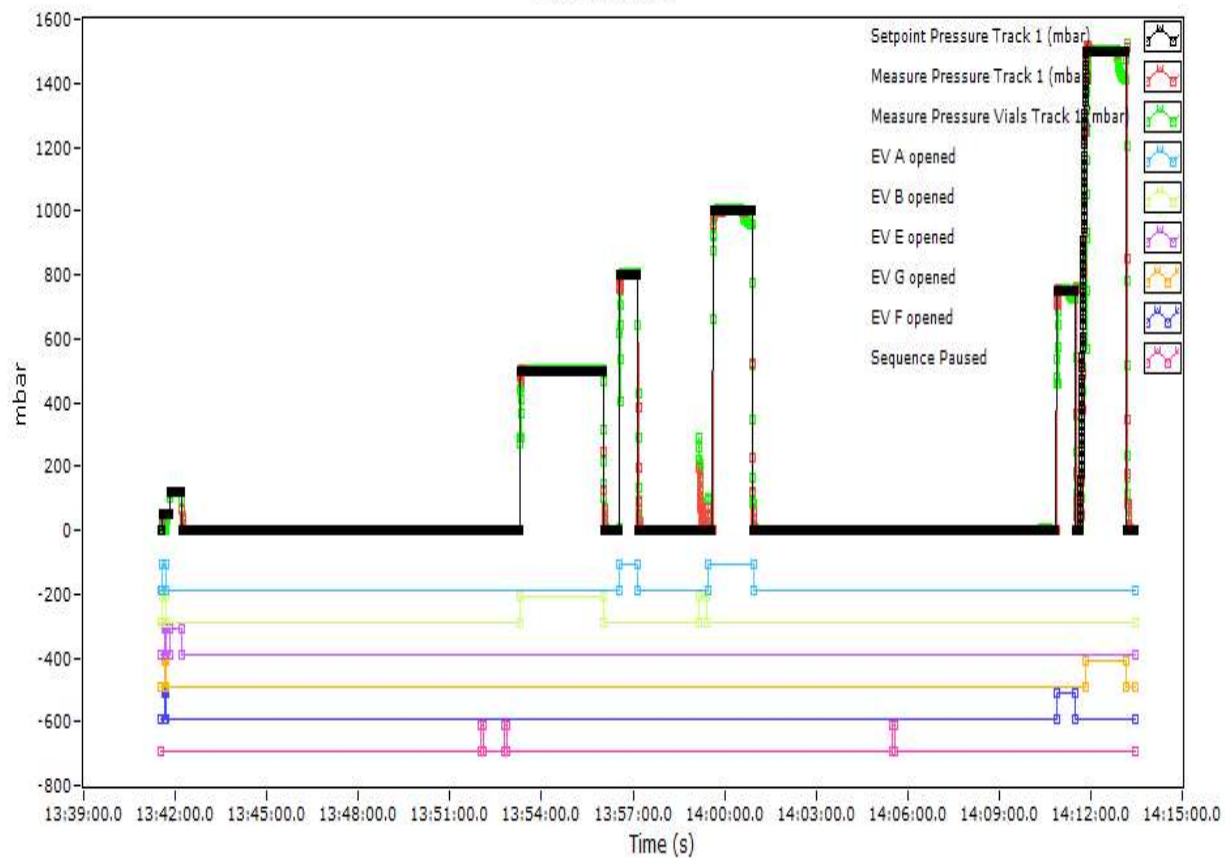

Pressure track 1

Pressure track 2

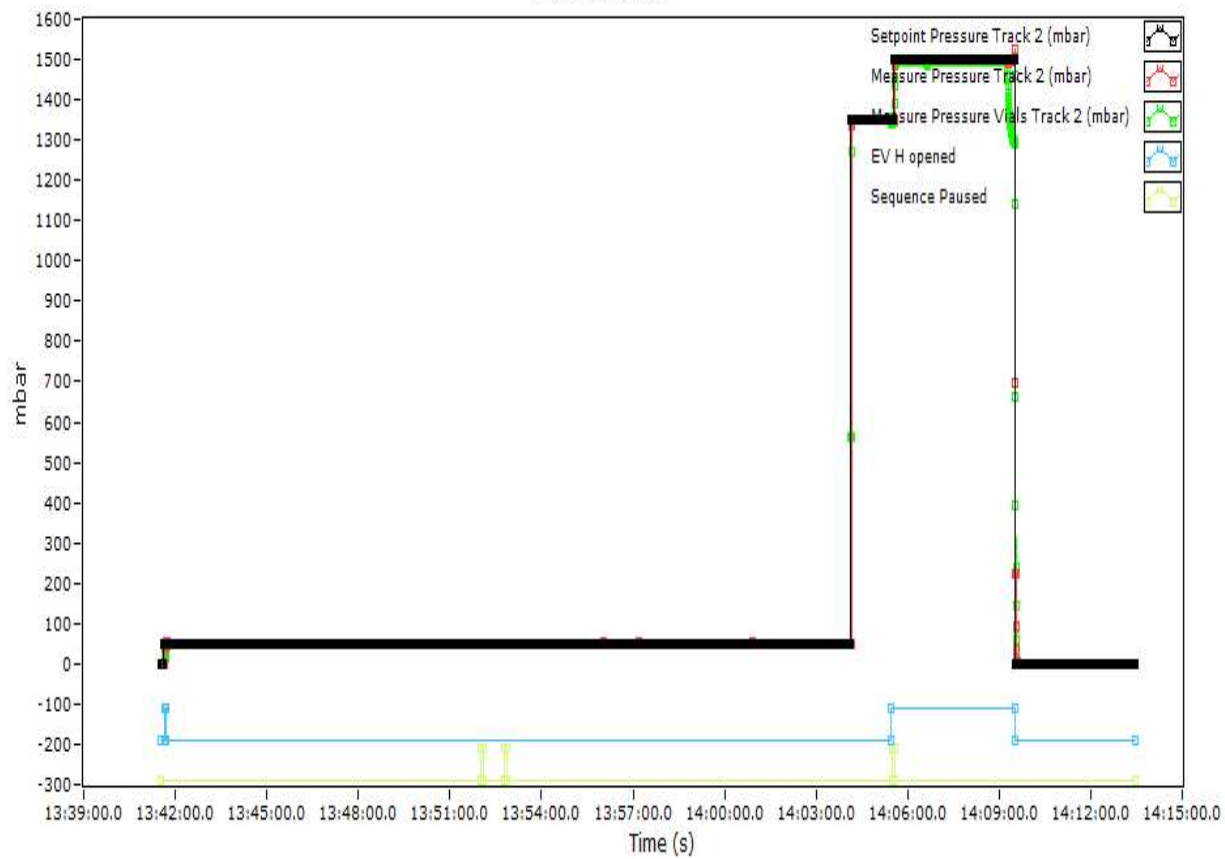

Pressure track 2

Pressure track 3

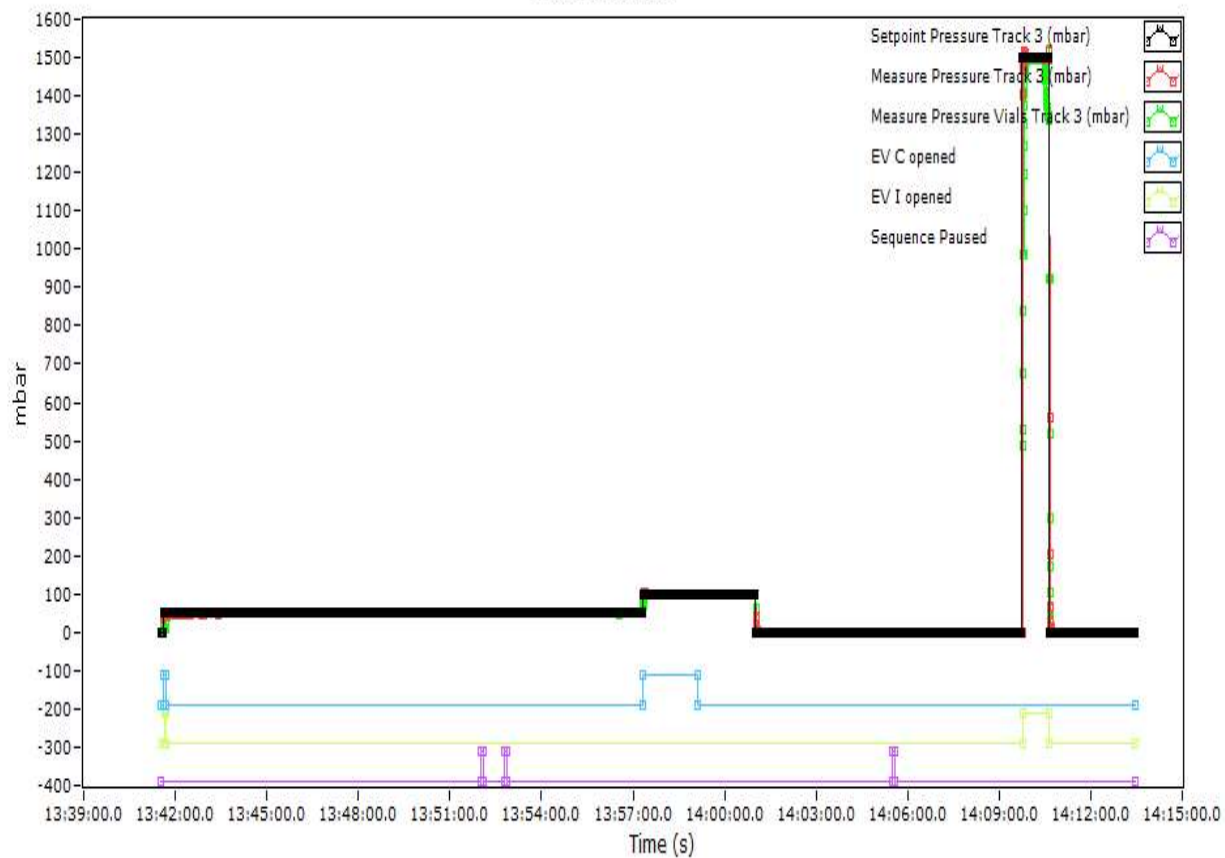

Pressure track 3

### Pressure regulator

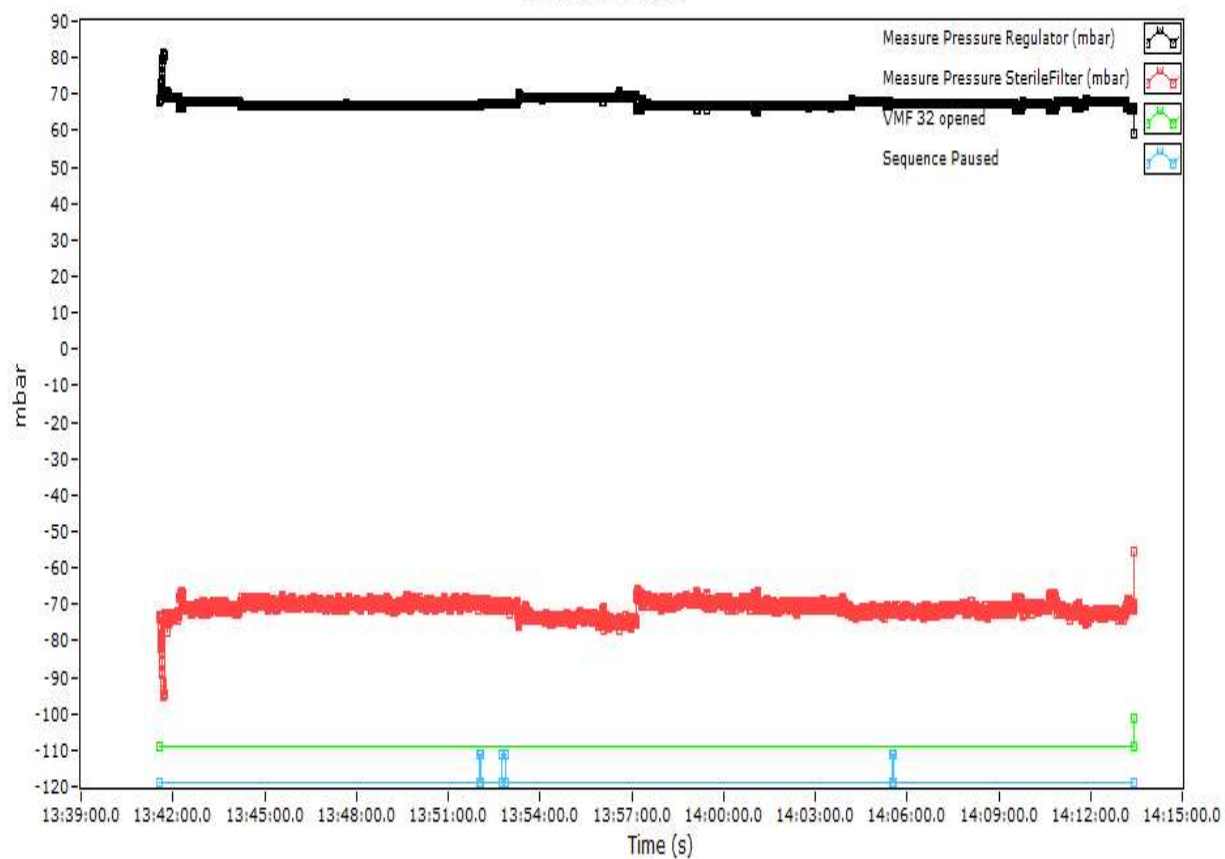

### Pressure regulator

### Isotope optical detection

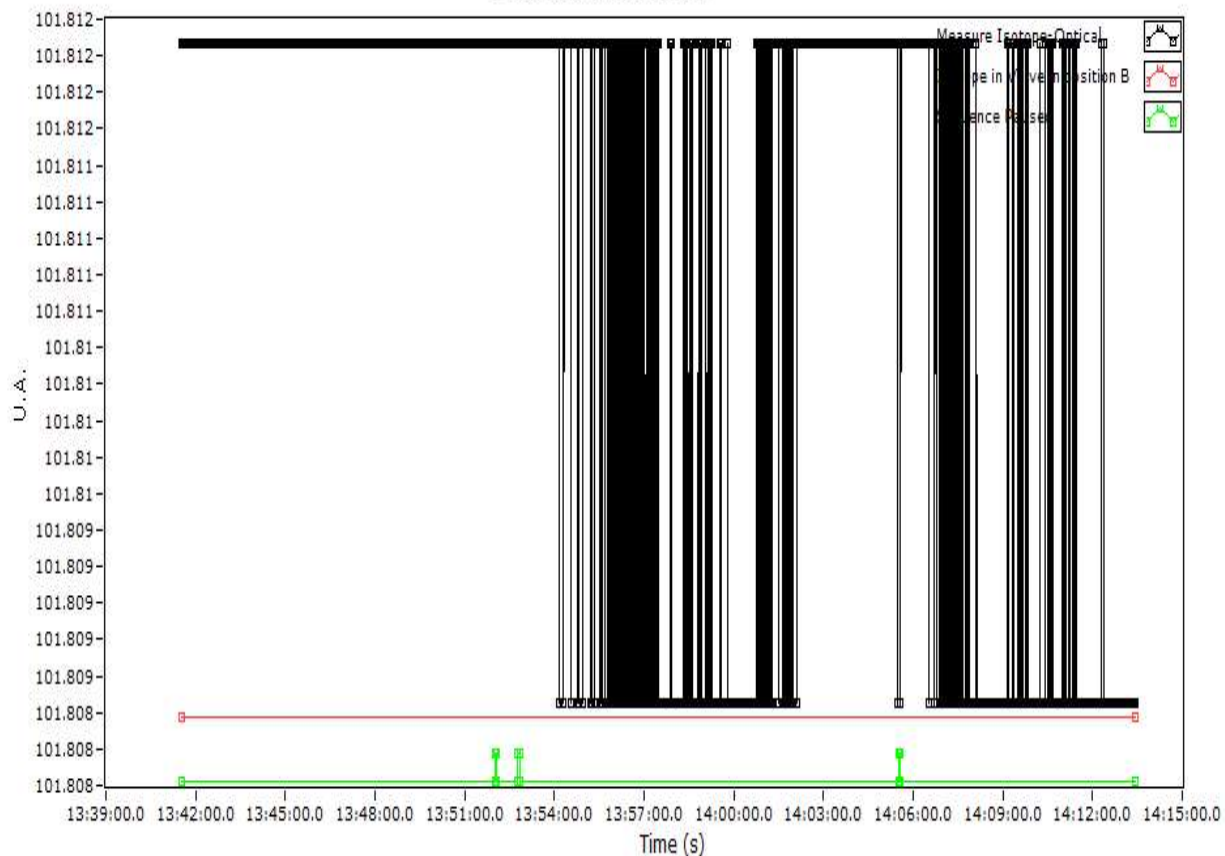

### Isotope optical detection

HPLC optical detection

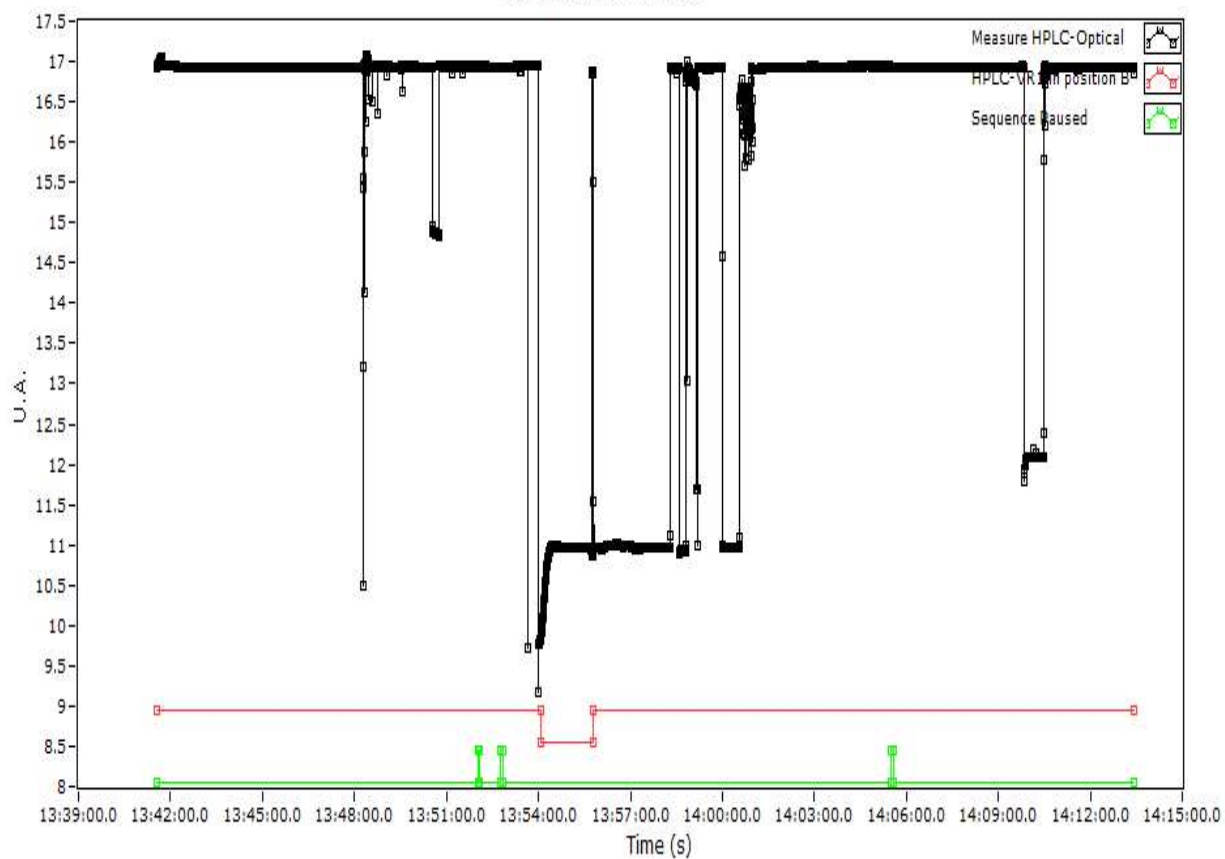

HPLC optical detection

Cartridge activity

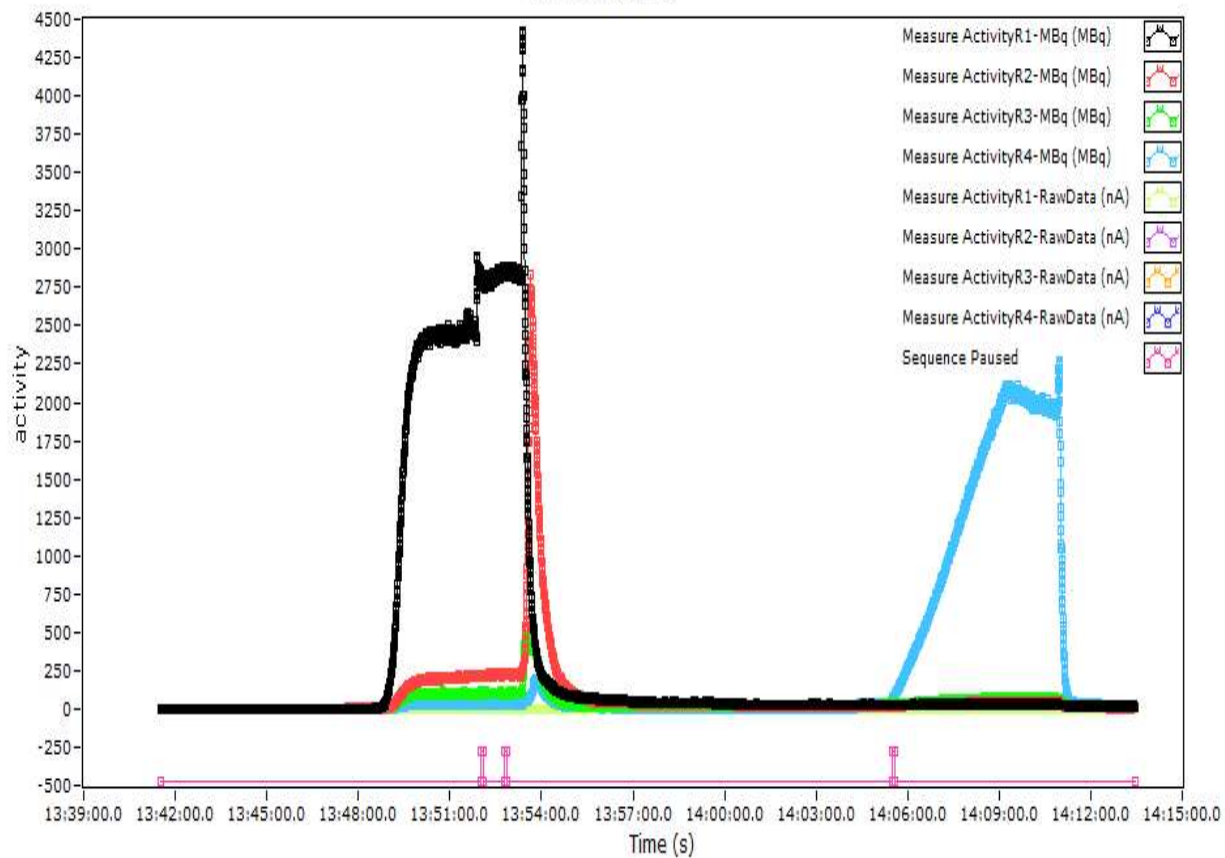

Cartridge activity

# Valves states

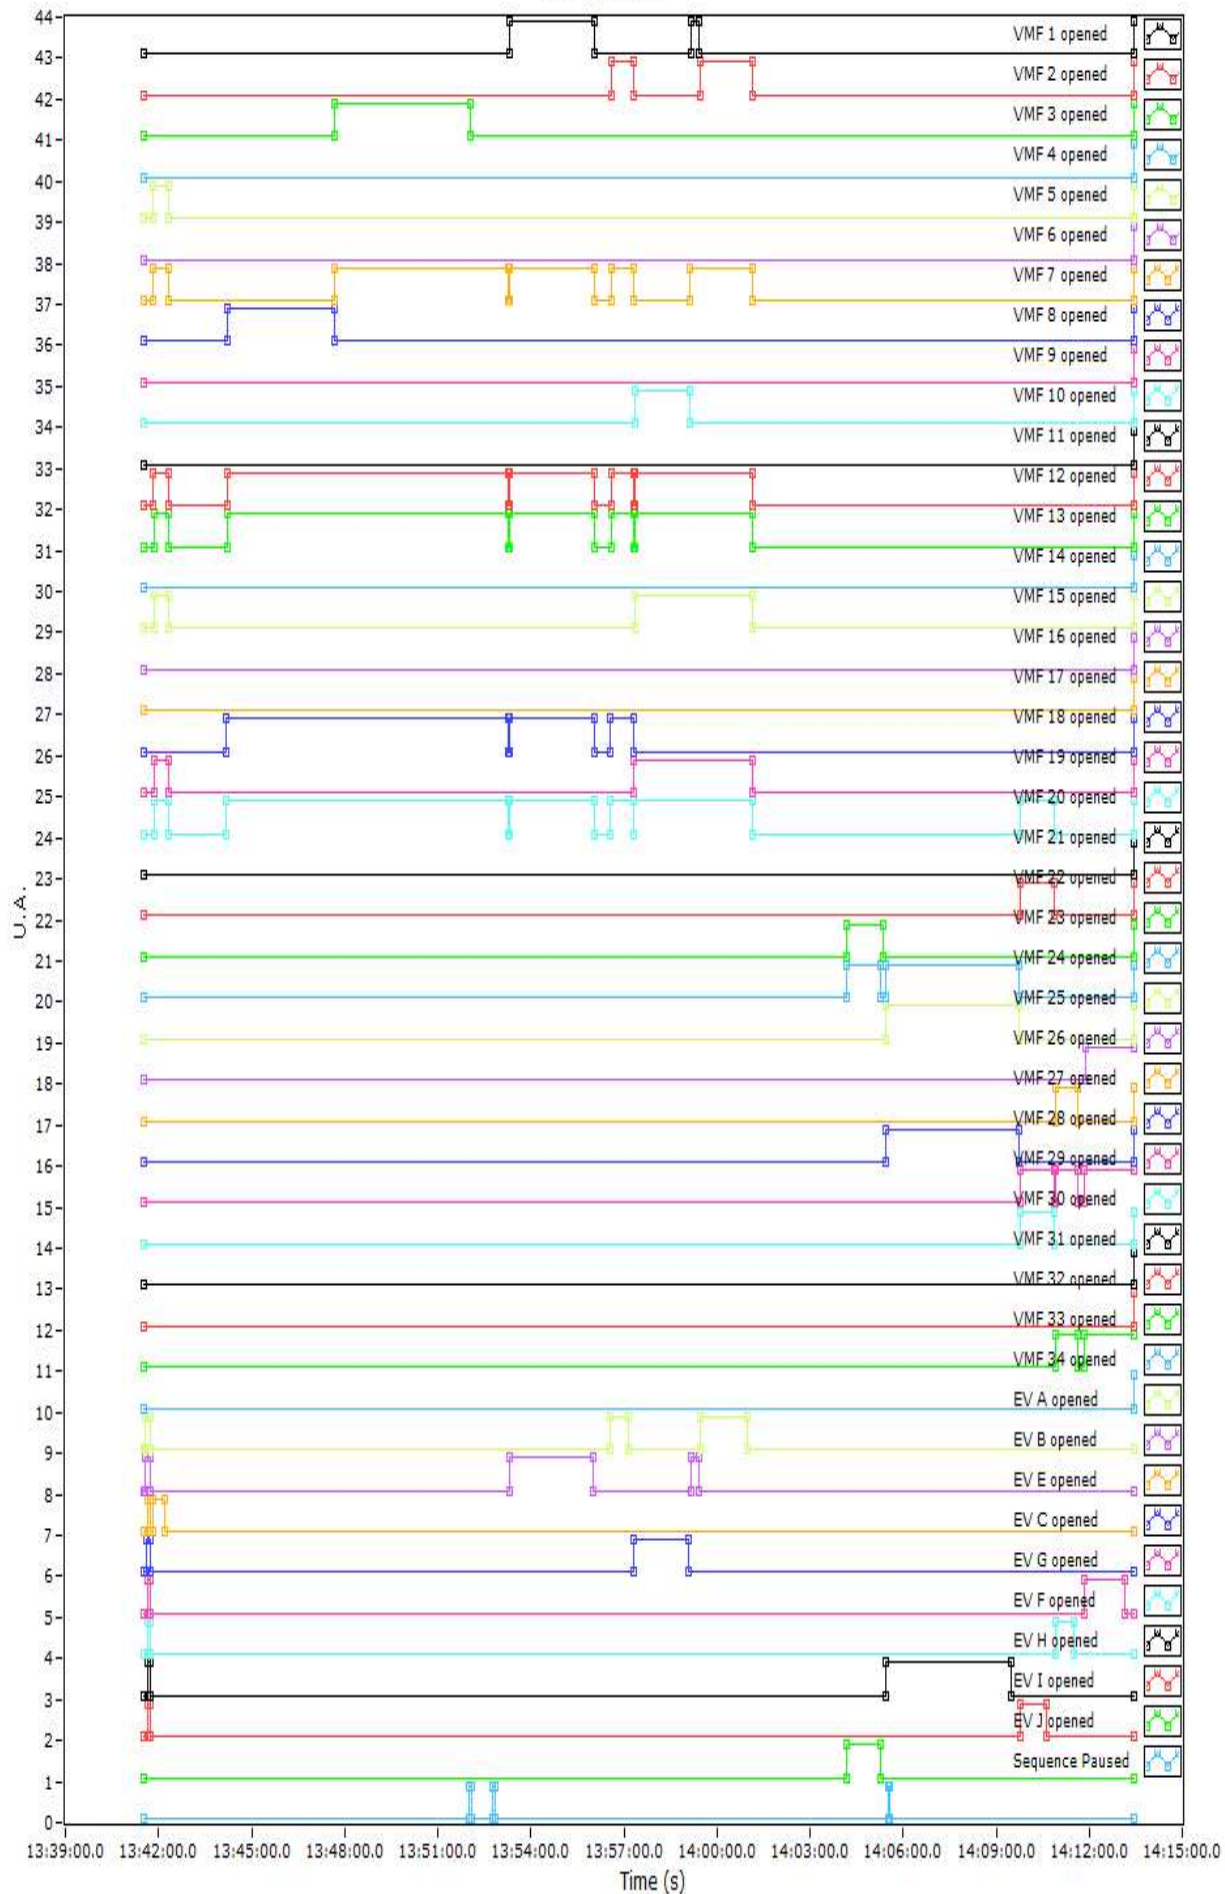



### Peltier temperature

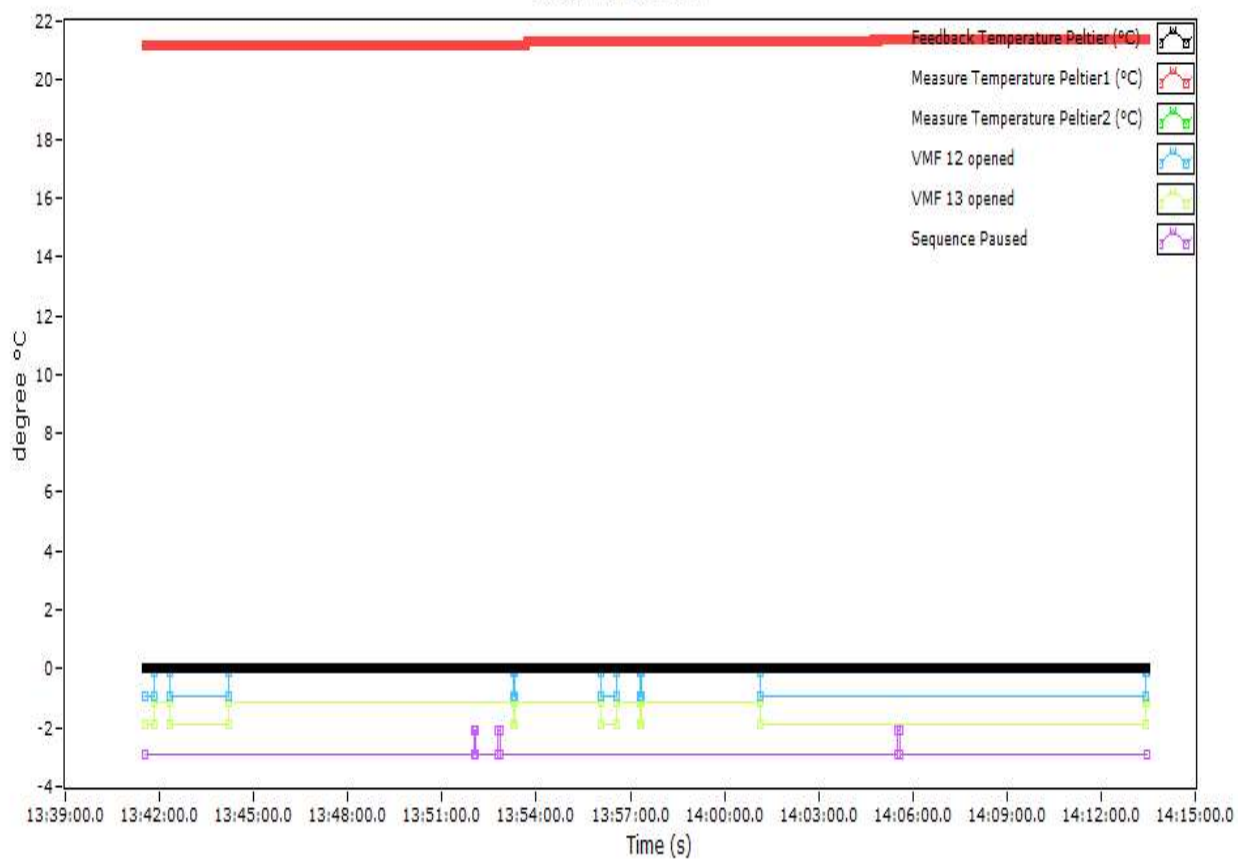

### Peltier temperature

### HPLC pump

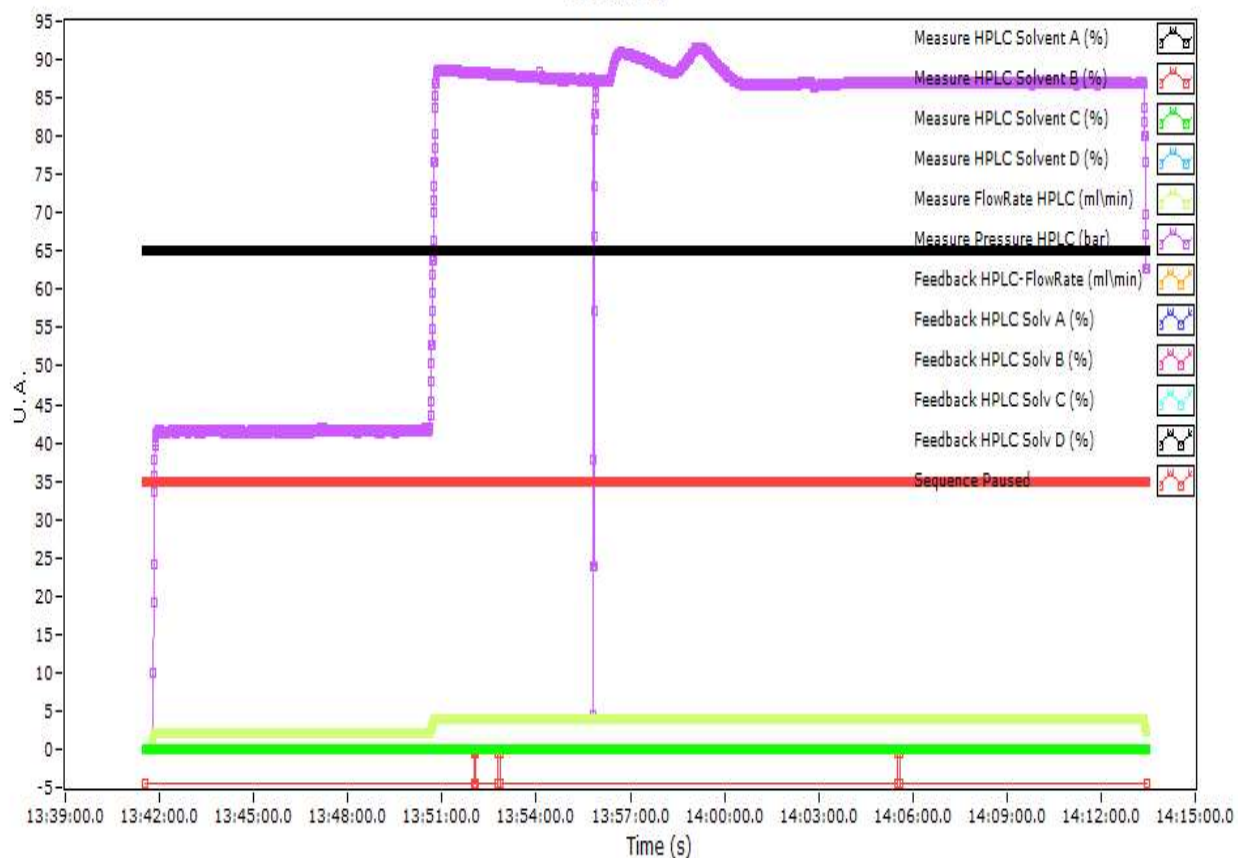

### HPLC pump

# Detection HPLC out

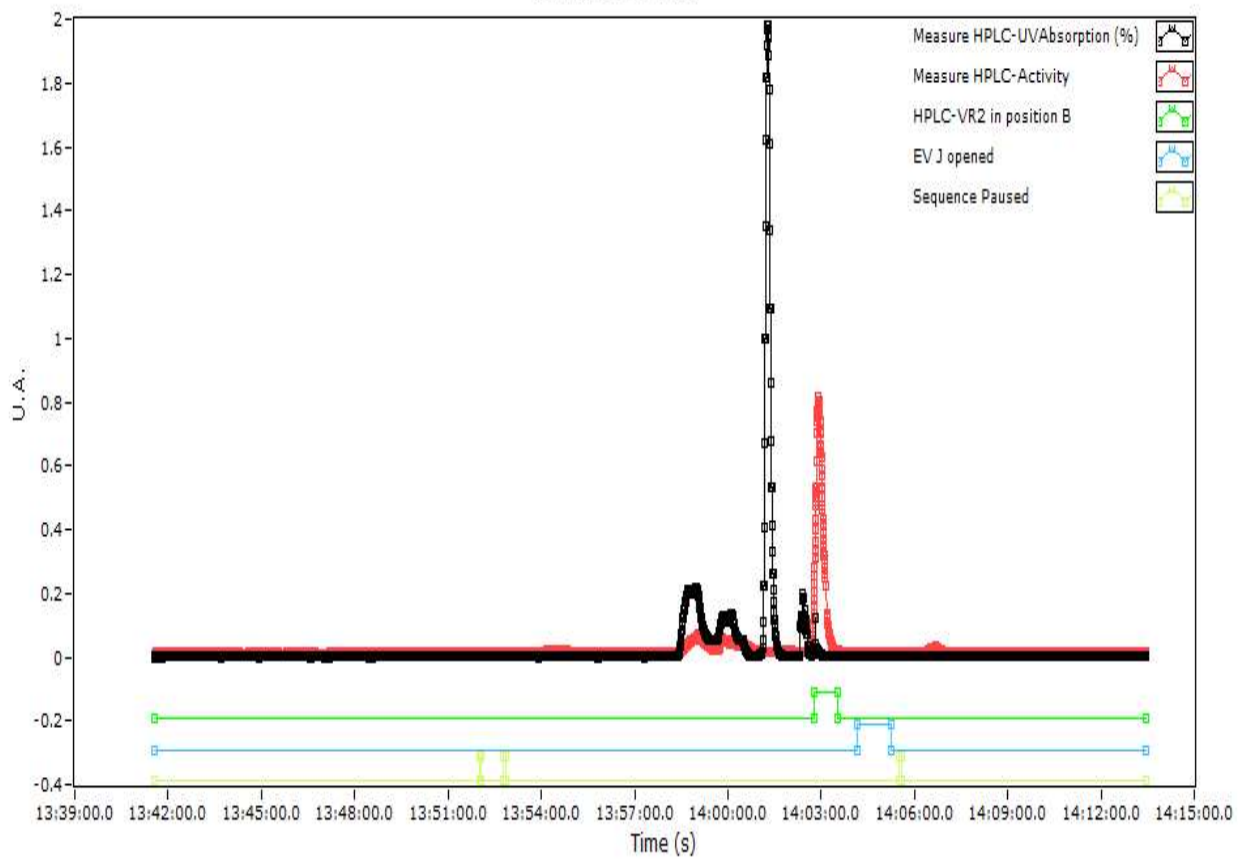

Detection HPLC out
